# Supplementary material for: A novel polyoxometalate templated microporous metal–organic framework with electrochemical properties
Source: Royal Society of Chemistry journal article supplement (doi:10.1039/c5ra06204g), 2015-01-01
Supplement: c5ra06204g1.pdf [file c5ra06204g1.pdf]

Supplementary Material (ESI) for RSC Advances  
This journal is © The Royal Society of Chemistry

## A novel polyoxometalate templated microporous metal–organic framework with electrochemical properties†

Xiuli Wang,<sup>\*a</sup> Zhihan Chang, Hongyan Lin, Chuang Xu, Jian Luan, Guocheng Liu, Aixiang Tian

Table S1. Selected bond distances (Å) and angles (°) for compound 1

|                     |            |                   |            |
|---------------------|------------|-------------------|------------|
| Cu(1)-N(1)#1        | 2.043(6)   | W(3)-O(8)         | 1.707(5)   |
| Cu(1)-N(1)          | 2.043(6)   | W(3)-O(7)#6       | 1.864(5)   |
| Cu(1)-N(1)#2        | 2.043(6)   | W(3)-O(6)         | 1.900(5)   |
| Cu(1)-N(1)#3        | 2.043(6)   | W(3)-O(5)         | 1.915(5)   |
| Cu(1)-O(1W)         | 2.411(14)  | W(3)-O(6)#5       | 1.962(5)   |
| W(1)-O(10)          | 1.713(5)   | W(3)-O(1)         | 2.389(4)   |
| W(1)-O(3)           | 1.880(5)   | P(1)-O(2)#6       | 1.527(5)   |
| W(1)-O(5)           | 1.902(5)   | P(1)-O(2)         | 1.527(5)   |
| W(1)-O(11)          | 1.917(5)   | P(1)-O(2)#5       | 1.527(5)   |
| W(1)-O(4)           | 1.931(5)   | P(1)-O(1)         | 1.560(8)   |
| W(1)-O(2)           | 2.369(5)   | O(1)-W(3)#5       | 2.389(4)   |
| W(2)-O(9)           | 1.728(5)   | O(1)-W(3)#6       | 2.389(4)   |
| W(2)-O(4)#5         | 1.869(5)   | O(4)-W(2)#6       | 1.869(5)   |
| W(2)-O(11)#4        | 1.879(5)   | O(6)-W(3)#6       | 1.962(5)   |
| W(2)-O(3)           | 1.925(5)   | O(7)-W(3)#5       | 1.864(5)   |
| W(2)-O(7)           | 1.967(5)   | O(11)-W(2)#4      | 1.879(5)   |
| W(2)-O(2)           | 2.368(5)   | N(1)#1-Cu(1)-N(1) | 89.971(11) |
| N(1)#1-Cu(1)-N(1)#2 | 89.971(11) | O(9)-W(2)-O(7)    | 97.6(2)    |
| N(1)-Cu(1)-N(1)#2   | 177.4(4)   | O(4)#5-W(2)-O(7)  | 86.2(2)    |
| N(1)#1-Cu(1)-N(1)#3 | 177.4(4)   | O(11)#4-W(2)-O(7) | 163.3(2)   |
| N(1)-Cu(1)-N(1)#3   | 89.971(10) | O(3)-W(2)-O(7)    | 86.7(2)    |
| N(1)#2-Cu(1)-N(1)#3 | 89.971(11) | O(9)-W(2)-O(2)    | 172.9(2)   |
| N(1)#1-Cu(1)-O(1W)  | 91.3(2)    | O(4)#5-W(2)-O(2)  | 84.93(19)  |
| N(1)-Cu(1)-O(1W)    | 91.3(2)    | O(11)#4-W(2)-O(2) | 83.00(19)  |
| N(1)#2-Cu(1)-O(1W)  | 91.3(2)    | O(3)-W(2)-O(2)    | 72.50(19)  |
| N(1)#3-Cu(1)-O(1W)  | 91.3(2)    | O(7)-W(2)-O(2)    | 80.30(19)  |

|                     |           |                    |            |
|---------------------|-----------|--------------------|------------|
| O(10)-W(1)-O(3)     | 100.4(3)  | O(8)-W(3)-O(7)#6   | 103.9(2)   |
| O(10)-W(1)-O(5)     | 97.9(2)   | O(8)-W(3)-O(6)     | 100.6(3)   |
| O(3)-W(1)-O(5)      | 93.0(2)   | O(7)#6-W(3)-O(6)   | 90.5(2)    |
| O(10)-W(1)-O(11)    | 98.3(2)   | O(8)-W(3)-O(5)     | 102.7(3)   |
| O(3)-W(1)-O(11)     | 91.3(2)   | O(7)#6-W(3)-O(5)   | 86.9(2)    |
| O(5)-W(1)-O(11)     | 162.2(2)  | O(6)-W(3)-O(5)     | 156.5(2)   |
| O(10)-W(1)-O(4)     | 102.5(3)  | O(8)-W(3)-O(6)#5   | 99.0(2)    |
| O(3)-W(1)-O(4)      | 157.0(2)  | O(7)#6-W(3)-O(6)#5 | 157.0(2)   |
| O(5)-W(1)-O(4)      | 85.1(2)   | O(6)-W(3)-O(6)#5   | 87.2(3)    |
| O(11)-W(1)-O(4)     | 84.2(2)   | O(5)-W(3)-O(6)#5   | 86.2(2)    |
| O(10)-W(1)-O(2)     | 173.6(3)  | O(8)-W(3)-O(1)     | 170.0(2)   |
| O(3)-W(1)-O(2)      | 73.2(2)   | O(7)#6-W(3)-O(1)   | 84.64(19)  |
| O(5)-W(1)-O(2)      | 82.13(19) | O(6)-W(3)-O(1)     | 73.73(19)  |
| O(11)-W(1)-O(2)     | 82.59(19) | O(5)-W(3)-O(1)     | 82.77(18)  |
| O(4)-W(1)-O(2)      | 83.9(2)   | O(6)#5-W(3)-O(1)   | 72.73(19)  |
| O(9)-W(2)-O(4)#5    | 101.7(2)  | O(2)#6-P(1)-O(2)   | 111.90(18) |
| O(9)-W(2)-O(11)#4   | 99.0(3)   | O(2)#6-P(1)-O(2)#5 | 111.90(18) |
| O(4)#5-W(2)-O(11)#4 | 92.1(2)   | O(2)-P(1)-O(2)#5   | 111.90(18) |
| O(9)-W(2)-O(3)      | 100.7(2)  | O(2)#6-P(1)-O(1)   | 106.9(2)   |
| O(4)#5-W(2)-O(3)    | 157.2(2)  | O(2)-P(1)-O(1)     | 106.9(2)   |
| O(11)#4-W(2)-O(3)   | 88.5(2)   | O(2)#5-P(1)-O(1)   | 106.9(2)   |

Symmetry code: #1  $z, y, -x + 1$ ; #2  $-x + 1, y, -z + 1$ ; #3  $-z + 1, y, x$ ; #4  $-x + 1/2, -z + 3/2, -y + 3/2$ ; #5  $-z + 1, -x + 1, y$ ; #6  $-y + 1, z, -x + 1$ .

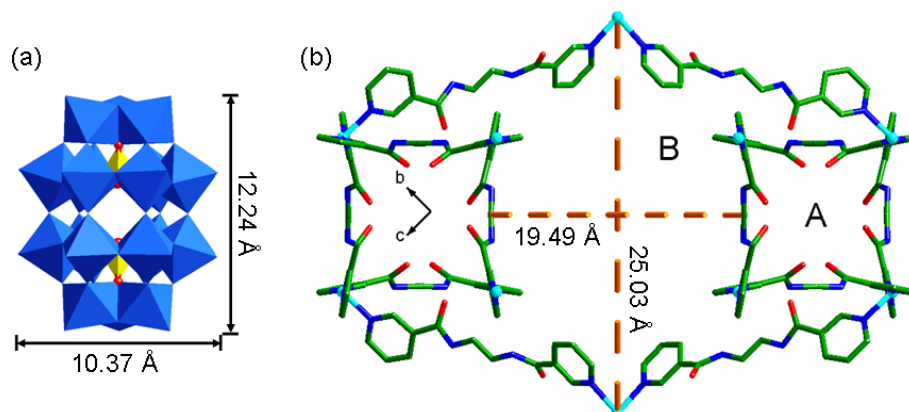

**Fig. S1** (a) Polyhedral representation of the  $P_2W_{18}$  anion. (b) Representation of the channels A and B in the 3D net viewed along the  $a$ -axis.

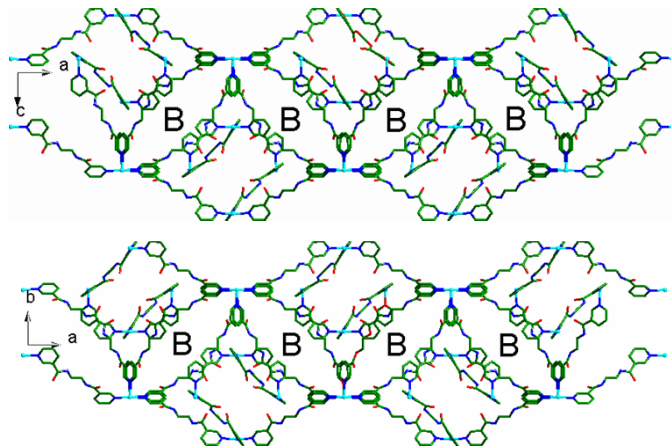

**Fig. S2** Representations of the channels B in the 3D net viewed along the  $b/c$ -axis.

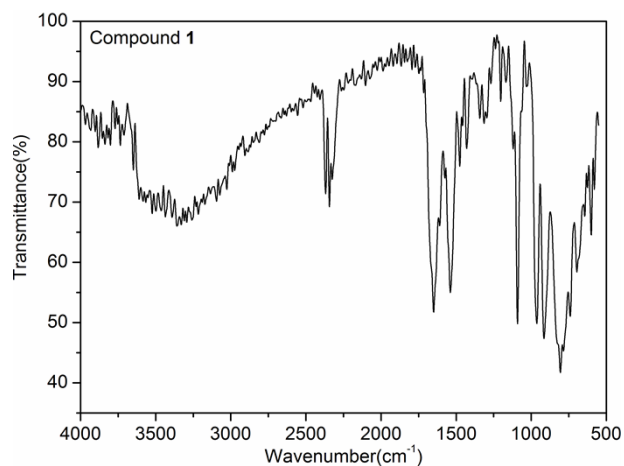

**Fig. S3** The IR spectrum of compound 1.

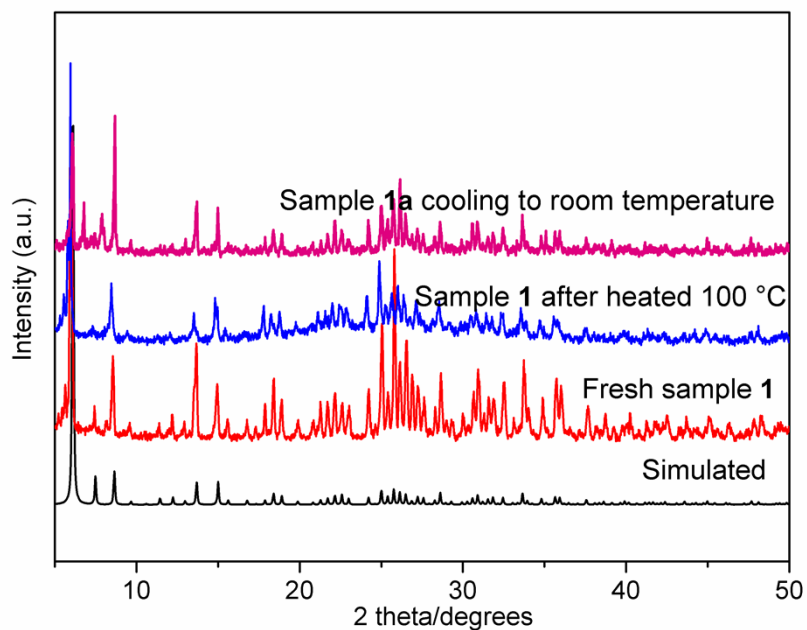

**Fig. S4** X-ray powder diffraction patterns of compound **1** (simulated from single-crystal X-ray data and fresh sample), **1a** and **1a** cooling to room temperature

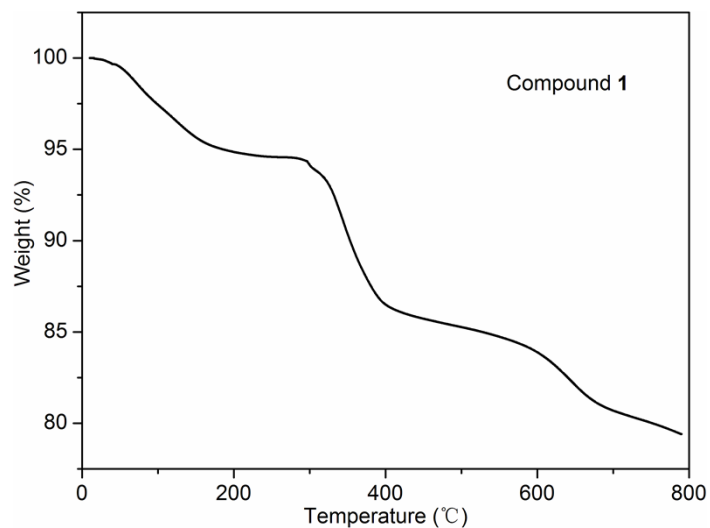

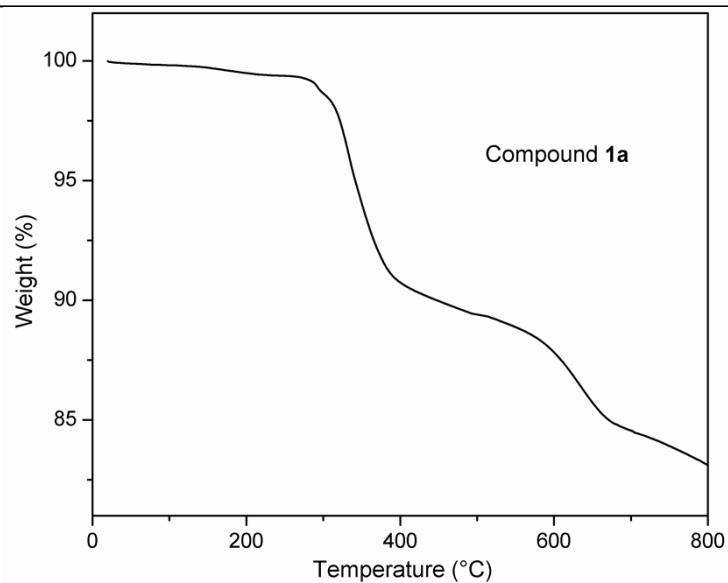

Fig. S5 The TG curves of compounds 1 and 1a.

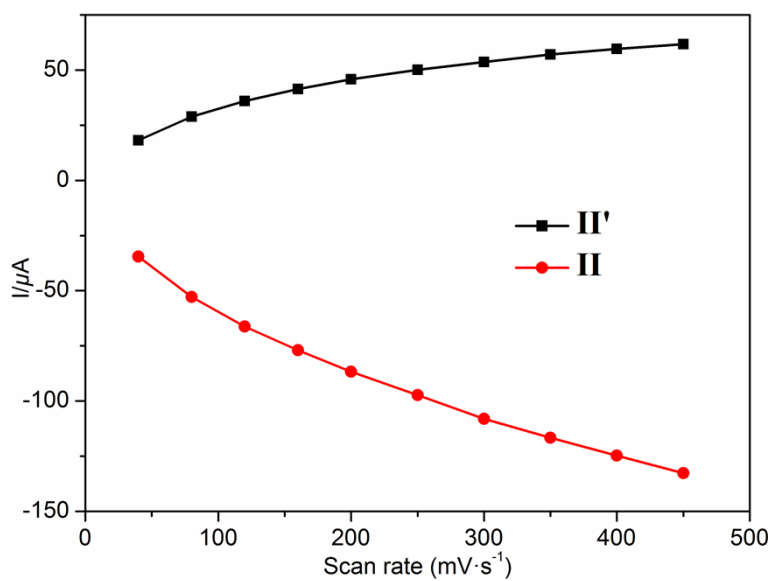

Fig. S6 The plots of the anodic and cathodic peak currents ( II-II') against scan rates.
